# Supplementary material for: Treatment of diarrhea in young children: results from surveys on the perception and use of oral rehydration solutions, antibiotics, and other therapies in India and Kenya
Source: PubMed Central journal article supplement (PMC3700033; doi:10.7189/jogh.03.010403), 2013-06
Supplement: jogh-03-010403-s001.pdf [file jogh-03-010403-s001.pdf]

## Online Supplementary Document

Zwisler et al. Treatment of diarrhea in young children: results from surveys on the perception and use of ORS, antibiotics, and other therapies in India and Kenya.

Journal of Global Health 2013;3:010403

**Table s1: respondents, health care workers and pharmacy staff**

| <b>INDIA</b>                                           | <b><u>Total</u></b> | <b><u>Rural</u></b> | <b><u>Urban</u></b> |
|--------------------------------------------------------|---------------------|---------------------|---------------------|
| <u>Health care workers, total (public and private)</u> | 134                 | 73                  | 61                  |
| Public:                                                |                     |                     |                     |
| Clinical officers                                      | 10                  | --                  | 10                  |
| Nurses                                                 | 31                  | --                  | 31                  |
| ASHAs                                                  | 30                  | 30                  | --                  |
| Private:                                               |                     |                     |                     |
| GPs with degree (MBBS)                                 | 32                  | 15                  | 17                  |
| GPs without degree (no MBBS)                           | 31                  | 16                  | 15                  |
| <u>Pharmacy staff, total</u>                           | 121                 | 60                  | 61                  |
| Owners/managers                                        | 61                  | 30                  | 31                  |
| Assistants                                             | 60                  | 30                  | 30                  |
| <b>KENYA</b>                                           | <b><u>Total</u></b> | <b><u>Rural</u></b> | <b><u>Urban</u></b> |
| <u>Health care workers, total (public and private)</u> | 117                 | 72                  | 45                  |
| Public:                                                |                     |                     |                     |
| Clinical officers                                      | 45                  | 27                  | 18                  |
| Nurses                                                 | 45                  | 27                  | 18                  |
| Private: doctors                                       | 27                  | 18                  | 9                   |
| <u>Pharmacy staff, total:</u>                          | 144                 | 80                  | 64                  |
| Owners/managers                                        | 74                  | 42                  | 32                  |
| Pharmacy assistants                                    | 70                  | 38                  | 32                  |

Notes: interviews were spread across 4 states in India (Uttar Pradesh, Tamil Nadu, Maharashtra, West Bengal) and 4 provinces in Kenya (Nairobi, Nyanza, Rift Valley, Coast). India abbreviations: ASHA (Accredited Social Health Activist); GP (General Practitioner); MBBS (Bachelor of Medicine, Bachelor of Surgery).

| <b>Table s2: acceptable speed of action</b>                             | <b>INDIA</b> | <b>KENYA</b> |
|-------------------------------------------------------------------------|--------------|--------------|
| <u>Acceptable speed of action:</u>                                      | (N = 1013)   | (N = 1001)   |
| Less than one full day                                                  | 30 %         | 30 %         |
| One full day                                                            | 19 %         | 23 %         |
| One-and-a-half to two days                                              | 28 %         | 28 %         |
| Three days or longer                                                    | 23 %         | 19 %         |
| <b>Mean desired time (days) to recovery</b>                             | <b>1.7</b>   | <b>1.6</b>   |
| Standard deviation                                                      | 1.2          | 1.07         |
| Confidence interval (95%)                                               | 1.6-1.8*     | 1.5-1.7*     |
| Note: carers data from R1 and R2 surveys, equally weighted. *At 95% CI. |              |              |

**Table s3. Reasons given for ranking antibiotics or ORS first  
(for ranking results see Table 3)**

| Ranking for:                                            | Antibiotics: why ranked 1 <sup>st</sup> (top mentions)                                                                     |                                                                                                 | ORS: why ranked 1 <sup>st</sup> (top mentions)                                                                   |                                                                                                             |
|---------------------------------------------------------|----------------------------------------------------------------------------------------------------------------------------|-------------------------------------------------------------------------------------------------|------------------------------------------------------------------------------------------------------------------|-------------------------------------------------------------------------------------------------------------|
|                                                         | <u>INDIA</u>                                                                                                               | <u>KENYA</u>                                                                                    | <u>INDIA</u>                                                                                                     | <u>KENYA</u>                                                                                                |
| <b>Most effective</b> at treating the cause of diarrhea | (N = 211)<br>Reduce frequency of bowel movements (52 %);<br>Gives quick relief (22 %);<br>Stops diarrhea immediately (12%) | (N = 181)<br>Stops diarrhea ... (51 %)<br>...quickly (33 %);<br>Kills bacteria/germs (27 %)     | (N = 101)<br>Hardens the stool (29 %);<br>Reduces frequency of bowel movements (25 %);<br>Improves energy (23 %) | (N = 140)<br>Stops diarrhea... (58 %)<br>...quickly (33 %);<br>Rehydrates (25 %);<br>Improves energy (11 %) |
| <b>Strongest medicine</b> for diarrhea                  | (N = 252)<br>Stops diarrhea immediately (35 %);<br>Stops diarrhea quickly (20 %);<br>Any speed of action (72 %)            | (N = 222)<br>Stops diarrhea (36 %)<br>Kills bacteria/germs (14 %);<br>Trusts antibiotics (12 %) | (N = 93)<br>Speed of action (40 %);<br>Replenishes lost fluids (28 %);<br>Improves energy (24 %)                 | (N = 117)<br>Stops diarrhea (40 %);<br>Replenishes fluid (15 %);<br>Improves energy (15 %)                  |
| <b>Easiest</b> to get children to take                  | (N = 87)<br>Easy to give (67 %);<br>Easy to prepare (9 %)                                                                  | (N = 140)<br>Sweet taste (31 %);<br>Good taste (24 %);<br>Comes in syrup form (14 %)            | (N = 126)<br>Easy to give to children (47 %);<br>Good taste (44 %)                                               | (N = 157)<br>Good taste (33 %);<br>Sweet (25 %);<br>Is given in liquid form (15 %)                          |
| <b>Best use of money</b> to treat diarrhea              | (N = 294)<br>Stops diarrhea immediately (36%)<br>Affordable (13%)                                                          | (N = 199)<br>Affordable (42 %);<br>Effective (21 %);<br>Speed of action (17 %)                  | (N = 110)<br>Affordable (38 %);<br>Easy for children to take (21 %);<br>Stops diarrhea immediately (15 %)        | (N = 203)<br>Affordable (53 %);<br>Free (20 %);<br>Effective (14 %)                                         |

Notes: R2 survey. \*Used at last episode of diarrhea.

**Table s4: views from pharmacy staff and health care workers**

|                                                                    | INDIA                   |                 |                            |                 | KENYA                   |                 |                            |                 |
|--------------------------------------------------------------------|-------------------------|-----------------|----------------------------|-----------------|-------------------------|-----------------|----------------------------|-----------------|
|                                                                    | <u>Pharmacy staff*</u>  |                 | <u>Health care workers</u> |                 | <u>Pharmacy staff*</u>  |                 | <u>Health care workers</u> |                 |
|                                                                    | N = 61<br>(below are %) |                 | N = 134<br>(below are %)   |                 | N = 74<br>(below are %) |                 | N = 117<br>(below are %)   |                 |
| <u>Statements:</u>                                                 | <u>Agree</u>            | <u>Disagree</u> | <u>Agree</u>               | <u>Disagree</u> | <u>Agree</u>            | <u>Disagree</u> | <u>Agree</u>               | <u>Disagree</u> |
| Mothers like to be given real medicines.                           | 98 %                    | 2 %             | 97 %                       | 3 %             | 91 %                    | 9 %             | 95 %                       | 4 %             |
| Mothers like to be given the most powerful treatment for diarrhea. | 82 %                    | 18 %            | 84 %                       | 16 %            | 86 %                    | 14 %            | 90 %                       | 9 %             |
| Antibiotics are the most effective treatment for diarrhea.         | 74 %                    | 25 %            | 74 %                       | 19 %            | 57 %                    | 42 %            | 25 %                       | 74 %            |
| Mothers do not really understand that ORS rehydrates the child.    | 36 %                    | 61 %            | 39 %                       | 54 %            | 55 %                    | 41 %            | 54 %                       | 45 %            |

Note: 'agree' and 'disagree' do not sum to 100% due to a few 'don't know' responses (not shown). \*Only owners/managers were asked for this exercise.

**Table s5: treatments given at last episode of diarrhea ~ India detail by socioeconomic grade**  
(see also Table 5, treatments given at last episode of diarrhea)

|                                                | ever-users of ORS |               |              |              | never users, but aware of ORS |               |              |              |
|------------------------------------------------|-------------------|---------------|--------------|--------------|-------------------------------|---------------|--------------|--------------|
|                                                | <u>A,B,C1</u>     | <u>C2,D,E</u> | <u>R1,R2</u> | <u>R3,R4</u> | <u>A,B,C1</u>                 | <u>C2,D,E</u> | <u>R1,R2</u> | <u>R3,R4</u> |
| Socioeconomic grades: A-E urban,<br>R1-4 rural |                   |               |              |              |                               |               |              |              |
| <u>Main treatments given:</u>                  | (N = 228)         | (N = 37)      | (N = 66)     | (N = 193)    | (N = 185)                     | (N = 51)      | (N = 47)     | (N = 108)    |
| Antibiotics                                    | 45 %              | 57 %          | 63 %         | 73 %         | 49 %                          | 49 %          | 55 %         | 60 %         |
| ORS                                            | 89 %              | 95 %          | 96 %         | 91 %         | --                            | --            | --           | --           |
| SSS                                            | 67 %              | 68 %          | 44 %         | 50 %         | 75 %                          | 66 %          | 54 %         | 50 %         |
| Other home remedy                              | 22 %              | 19 %          | 24 %         | 9 %          | 18 %                          | 10 %          | 9 %          | 9 %          |

Combined results from R1 and R2 surveys, weighted equally. Kenya detail by socioeconomic grade not included due to lack of notable differences between grades. Socioeconomic grades: ABC1 middle to high grades; C2DE lower to lower-middle grades; R1R2 rural middle to high grades; R3R4 rural lower to lower-middle grades.

**Table s6. Duration of last diarrhea episode, caregiver reaction time, and timing of treatment administration**

|                                                              | INDIA                                 |                                                  |             | KENYA                                 |                                                  |            |
|--------------------------------------------------------------|---------------------------------------|--------------------------------------------------|-------------|---------------------------------------|--------------------------------------------------|------------|
| <u>Duration of last episode of diarrhea:</u>                 | <u>Ever-users of ORS</u><br>(N = 529) | <u>Never-users but aware of ORS</u><br>(N = 484) |             | <u>Ever-users of ORS</u><br>(N = 534) | <u>Never-users but aware of ORS</u><br>(N = 467) |            |
| 1 day                                                        | 2 %                                   | 3 %                                              |             | 7 %                                   | 9 %                                              |            |
| 2 – 4 days*                                                  | 62 %                                  | 64 %                                             |             | 64 %                                  | 66 %                                             |            |
| 5 – 7 days*                                                  | 30 %                                  | 32 %                                             |             | 25 %                                  | 21 %                                             |            |
| 8 or more days                                               | 5 %                                   | 3%                                               |             | 4 %                                   | 3 %                                              |            |
| Mean duration, in days (standard deviation)                  | 4.3 (2.3)                             | 4.0 (2.0)                                        |             | 4.2 (3.5)                             | 3.7 (2.5)                                        |            |
| Median duration, in days (IQR)                               | 4 (2)                                 | 3(3)                                             |             | 3 (3.2)                               | 3 (2)                                            |            |
| <u>Reaction time at last episode of diarrhea:</u>            |                                       |                                                  |             |                                       |                                                  |            |
| Carer took any action as soon as they noticed diarrhea       | 75 %                                  | (N = 1013)                                       |             | 60 %                                  | (N = 1001)                                       |            |
| Median waiting time, among those who waited:                 | 1 full day                            | (N = 253)                                        |             | 1 full day                            | (N = 400)                                        |            |
| No treatment at last episode, before diarrhea ceased         | N = 5                                 | N = 20                                           |             | N = 40                                | N = 104                                          |            |
|                                                              | <u>Antibiotics</u>                    | <u>ORS</u>                                       | <u>SSS</u>  | <u>Antibiotics</u>                    | <u>ORS</u>                                       | <u>SSS</u> |
| <u>Treatment administration: day started, days continued</u> | N = 313                               | N = 284                                          | N = 302     | N = 252                               | N = 212                                          | N = 135    |
| Started (median, day of episode): (IQR)                      | Day 2(1)                              | Day 2 (1)                                        | Day 1 (0)   | Day 2(2)                              | Day 2(1)                                         | Day 1(1)   |
| Duration of administration (median): (IQR)                   | 3 days (2)                            | 3 days (2)                                       | 3 days(1.5) | 4 days(2)                             | 3 days(1)                                        | 2 days(1)  |

Notes: R1 and R2 surveys, equally weighted, for taking action and waiting time; round 1 only for treatment administration day started, days continued.

\*Grouped data (e.g., '2-4 days' combines responses for 2, 3, and 4 days). Treatment administration at last episode of diarrhea.

**Table s7: primary sources of main treatments used at last episode of diarrhea, and whether recommended**

|                        | INDIA              |            | KENYA              |            |
|------------------------|--------------------|------------|--------------------|------------|
|                        | <u>Antibiotics</u> | <u>ORS</u> | <u>Antibiotics</u> | <u>ORS</u> |
| <u>Where obtained:</u> | N = 313            | N = 284    | N = 252            | N = 212    |
| Private                | 80 %               | 80 %       | 27 %               | 21 %       |
| Public                 | 19 %               | 18 %       | 48 %               | 67 %       |
| Recommended*           | 95 %               | 75 %       | 77 %               | 89 %       |

Notes: R1 survey. \*Recommended by healthcare professional or pharmacy/drugstore staff.

**Table s8. Preferred presentation form, pack size**

|                                                                  | INDIA     | KENYA     |
|------------------------------------------------------------------|-----------|-----------|
| <u>Preferences for presentation form: most preferred choice*</u> | (N = 609) | (N = 600) |
| Conventional sachet                                              | 41 %      | 21 %      |
| Ready-to-drink, box                                              | 23 %      | 21 %      |
| Ready-to-drink, plastic bottle                                   | 19 %      | 29 %      |
| Syrup, followed by water                                         | 12 %      | 16 %      |
| Tablet, self-dissolving in water                                 | 3 %       | 7 %       |
| Alternative sachet                                               | 2 %       | 5 %       |
| <u>Preferences for ORS pack size: most preferred choice*</u>     |           |           |
| 200 mL                                                           | 78 %      | 59 %      |
| 1 L                                                              | 22 %      | 41 %      |

\*R1 survey. Illustrations were shown to respondents, who then indicated their preferred choice; the presentation choices were introduced as options for 'a new product to treat diarrhea', and the usage of each was described to respondents using simple statements.
